# Supplementary figures and images for: Effect of noninvasive ventilation on intubation risk in prehospital patients with acute cardiogenic pulmonary edema: a retrospective study
Source: PubMed Central journal article supplement — Eur J Emerg Med. 2019 Jul 9;27(1):54–8. doi: 10.1097/MEJ.0000000000000616 (PMC6946102; doi:10.1097/mej.0000000000000616), 2019-07-09

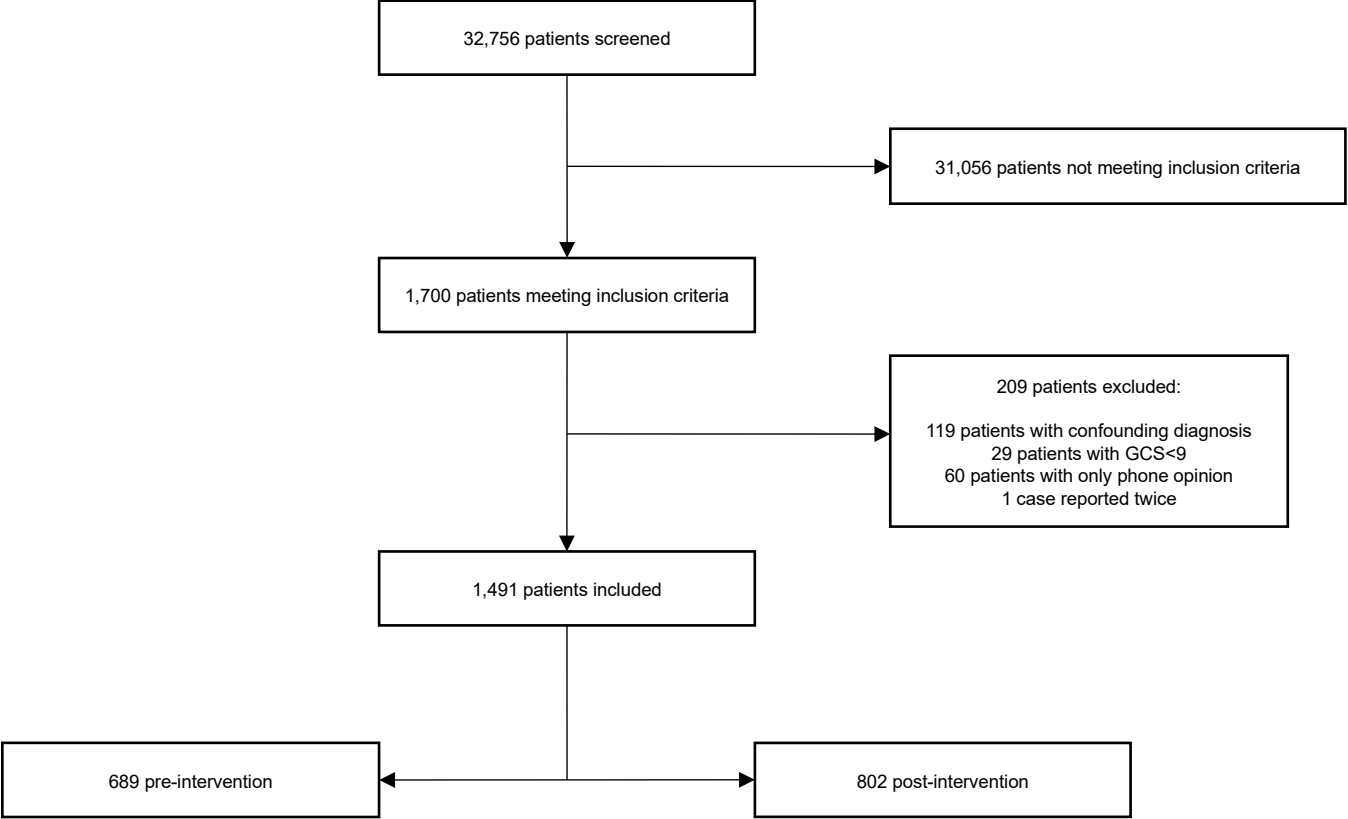

Supplement: ejem-27-54-s001.pdf [file ejem-27-54-s001.pdf]
